# Supplementary material for: Physical frailty deteriorates after a 5‐day dexamethasone course in children with acute lymphoblastic leukemia, results of a national prospective study
Source: PubMed Central journal article supplement (PMC10757098; doi:10.1002/cam4.6779), 2023-12-09
Supplement: CAM4-12-22304-s001.pdf [file CAM4-12-22304-s001.pdf]

|                                                               |                                                            |                                              |                                                              |                                                                                |                                                                                     |
|---------------------------------------------------------------|------------------------------------------------------------|----------------------------------------------|--------------------------------------------------------------|--------------------------------------------------------------------------------|-------------------------------------------------------------------------------------|
| <b>Components</b>                                             | <b>Low muscle mass</b>                                     | <b>Muscle weakness</b>                       | <b>Self-reported fatigue</b>                                 | <b>Slow walking speed</b>                                                      | <b>Low physical activity</b>                                                        |
| <b>Measuring instrument</b>                                   | Appendicular skeletal muscle mass by bioimpedance analysis | Handgrip strength using handheld dynamometry | Parent proxy-reported fatigue using PedsQL-MFS questionnaire | Time to rise from chair, walk 3-meters and back using the Timed Up and Go test | 3-11 years: parent proxy-reported questionnaires<br>12+ years: Baecke questionnaire |
| <b>Sarcopenia</b><br><i>Low muscle mass + muscle weakness</i> |                                                            |                                              |                                                              |                                                                                |                                                                                     |

**Physical Frailty**  
*Pre frailty = 2 components*  
*Frailty ≥ 3 components*
